# Supplementary figures and images for: p53 Promotes Cytokine Expression in Melanoma to Regulate Drug Resistance and Migration
Source: MDPI journal article supplement (doi:10.3390/cells11030405), 2022-01-25

A

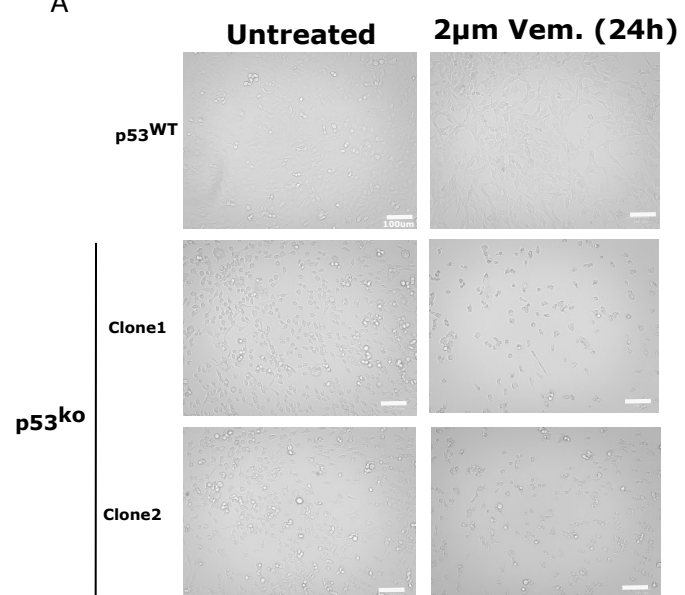

Supplement: s1 [file s1]

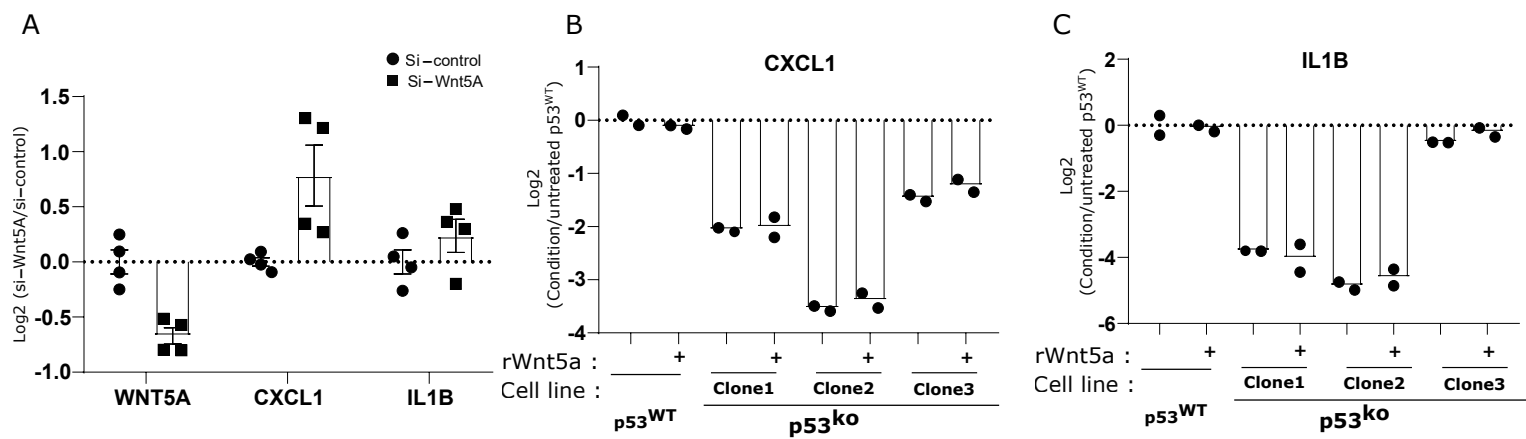

Supplement: s1 [file s1]

A

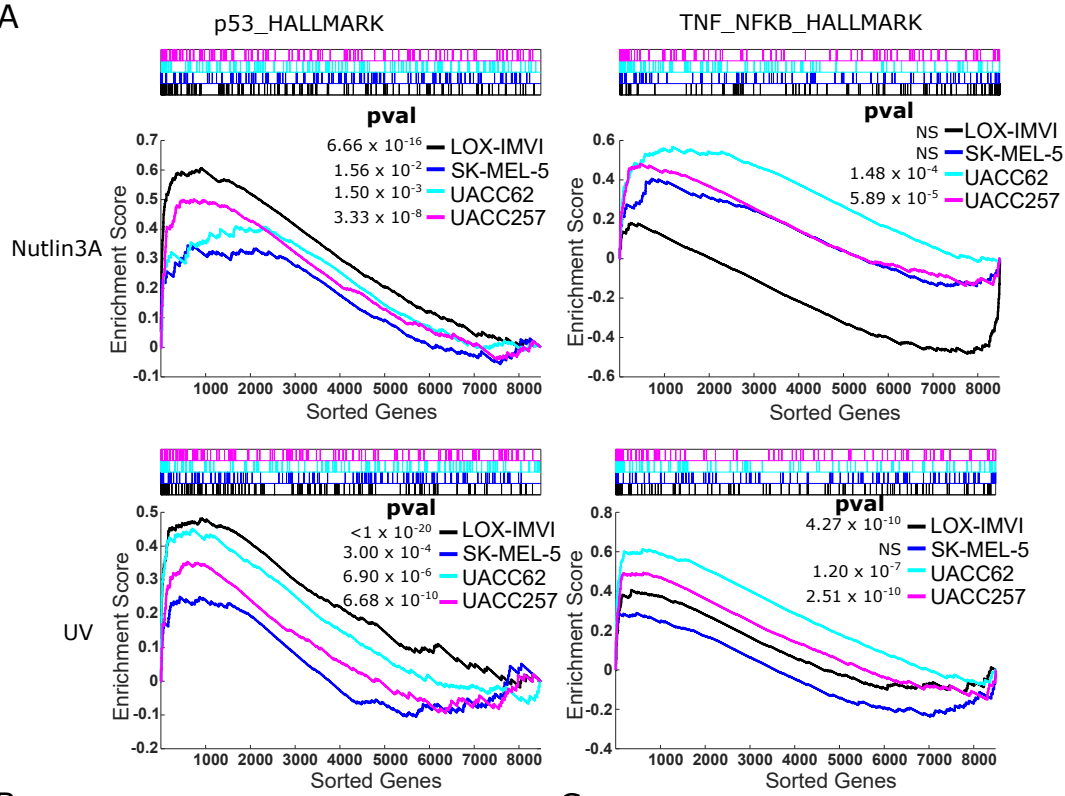

B

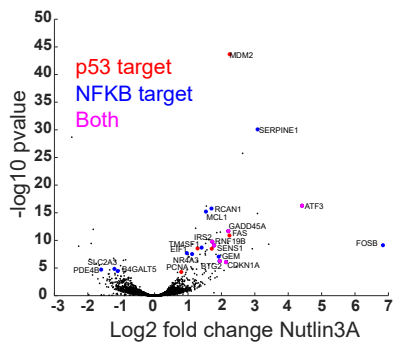

C

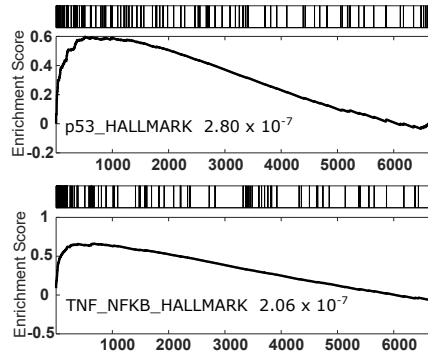

Supplement: s1 [file s1]

A

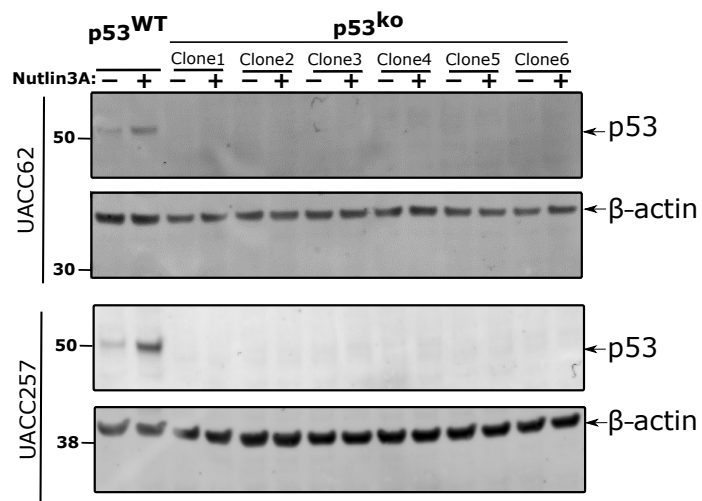

C

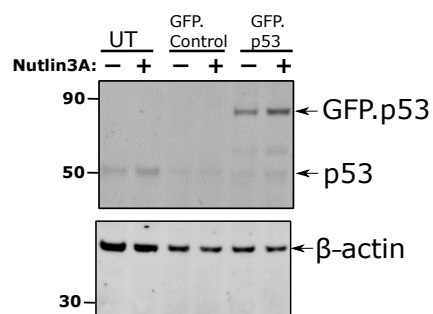

B

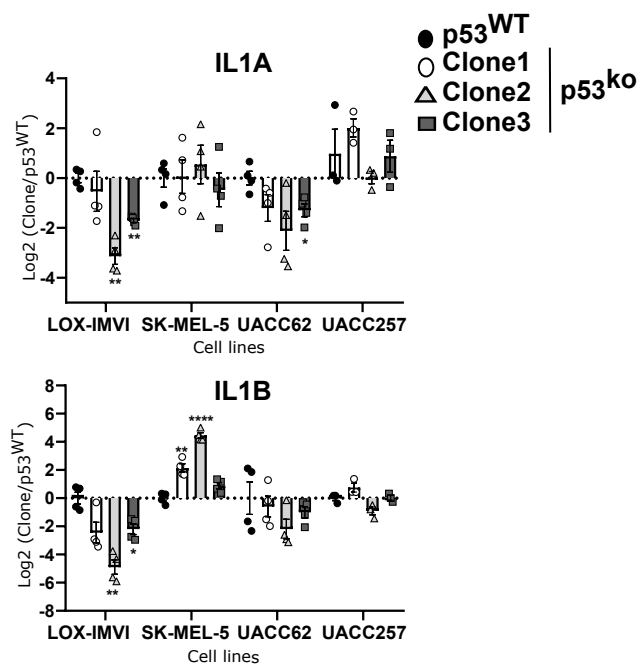

Supplement: s1 [file s1]

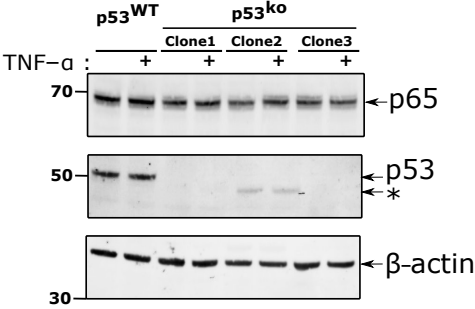

Supplement: s1 [file s1]
